# Supplementary material for: DNA barcoding of Oryza: conventional, specific, and super barcodes
Source: PubMed Central journal article supplement (PMC7858216; doi:10.1007/s11103-020-01054-3), 2020-09-03

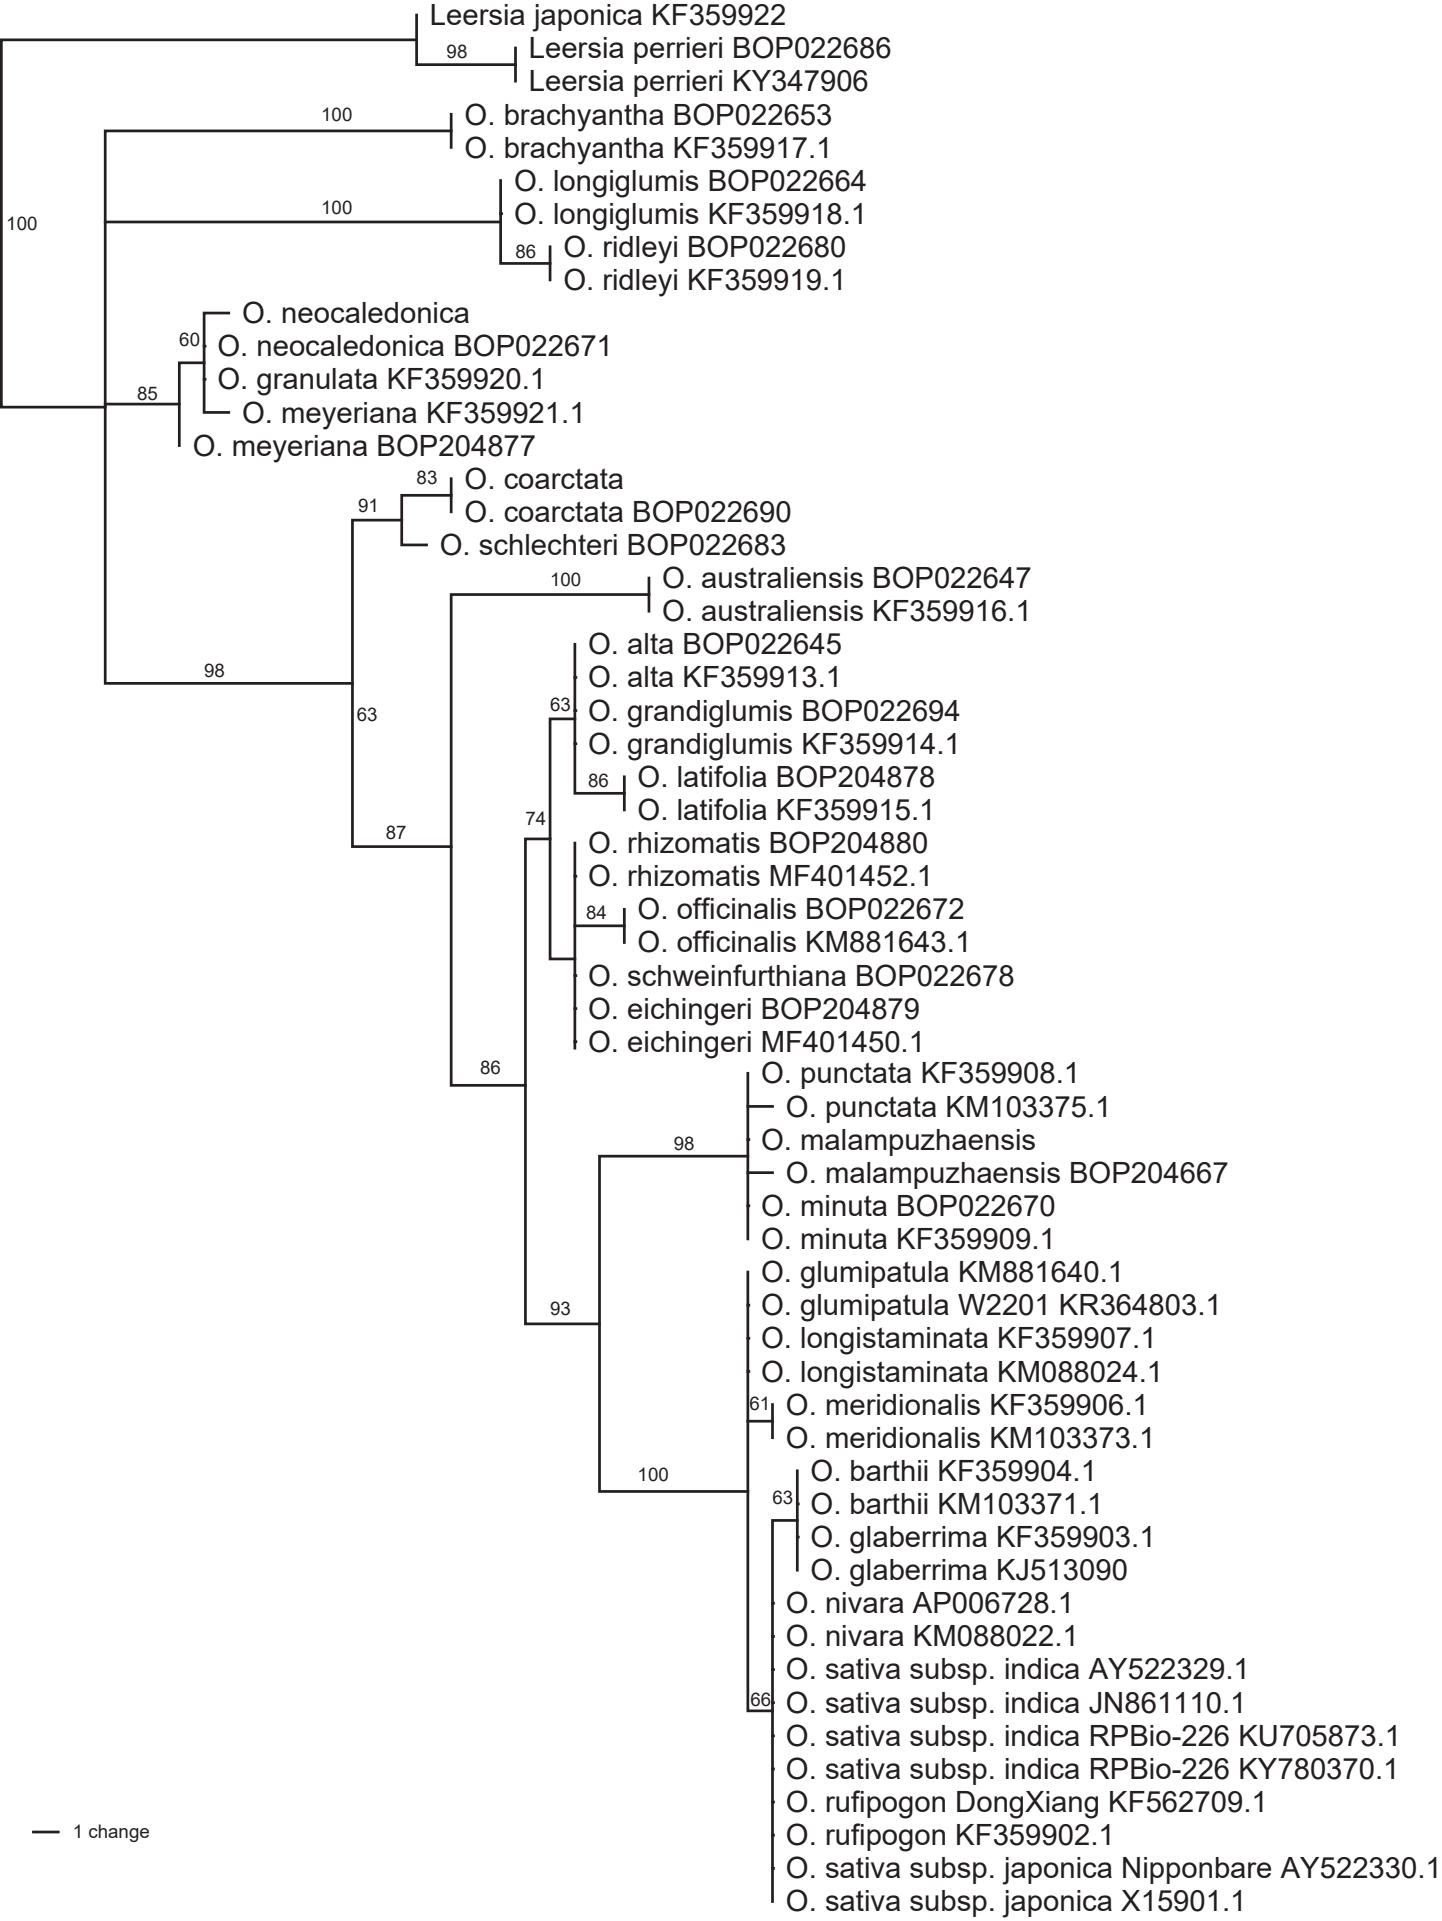

Supplement: 11103_2020_1054_MOESM1_ESM.pdf [file 11103_2020_1054_MOESM1_ESM.pdf]
